# Supplementary material for: Human Wagering Behavior Depends on Opponents' Faces
Source: PLOS journal article supplement (doi:10.1371/journal.pone.0011663), 2010-07-21

[A]

Effects of Faces on Perceptual Ratings

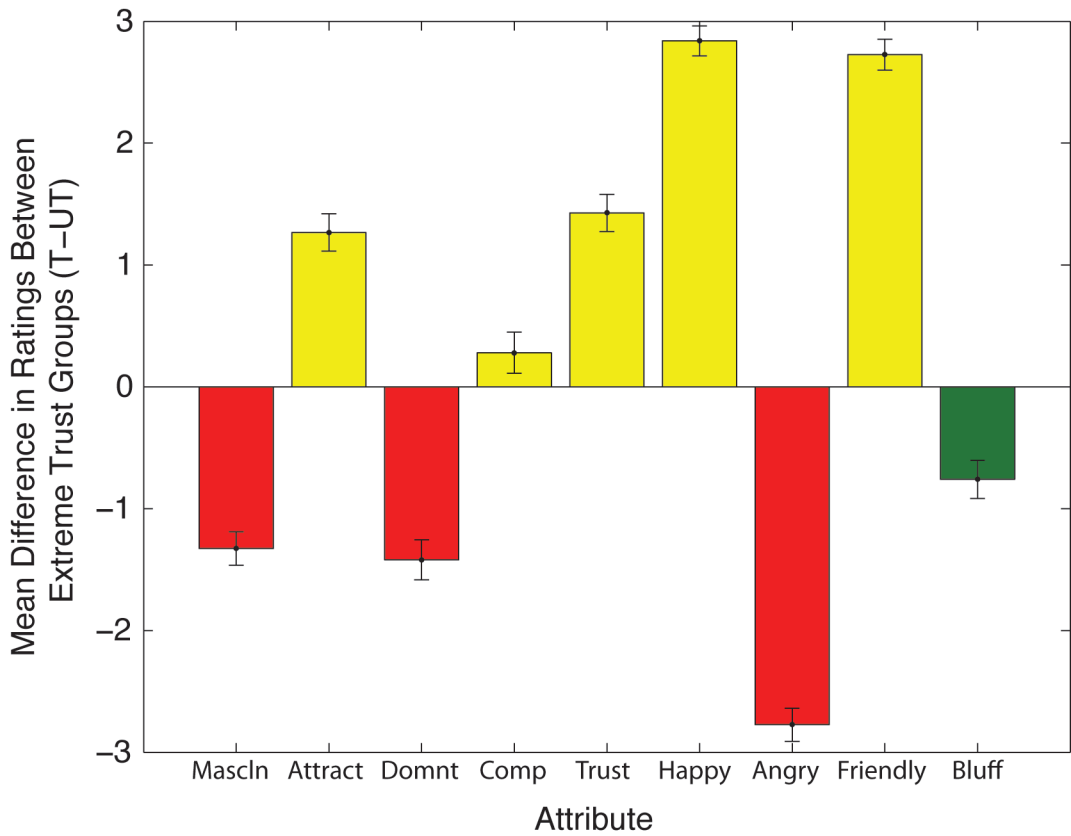

[B]

Relationship Between Perceptual Ratings and Wagering

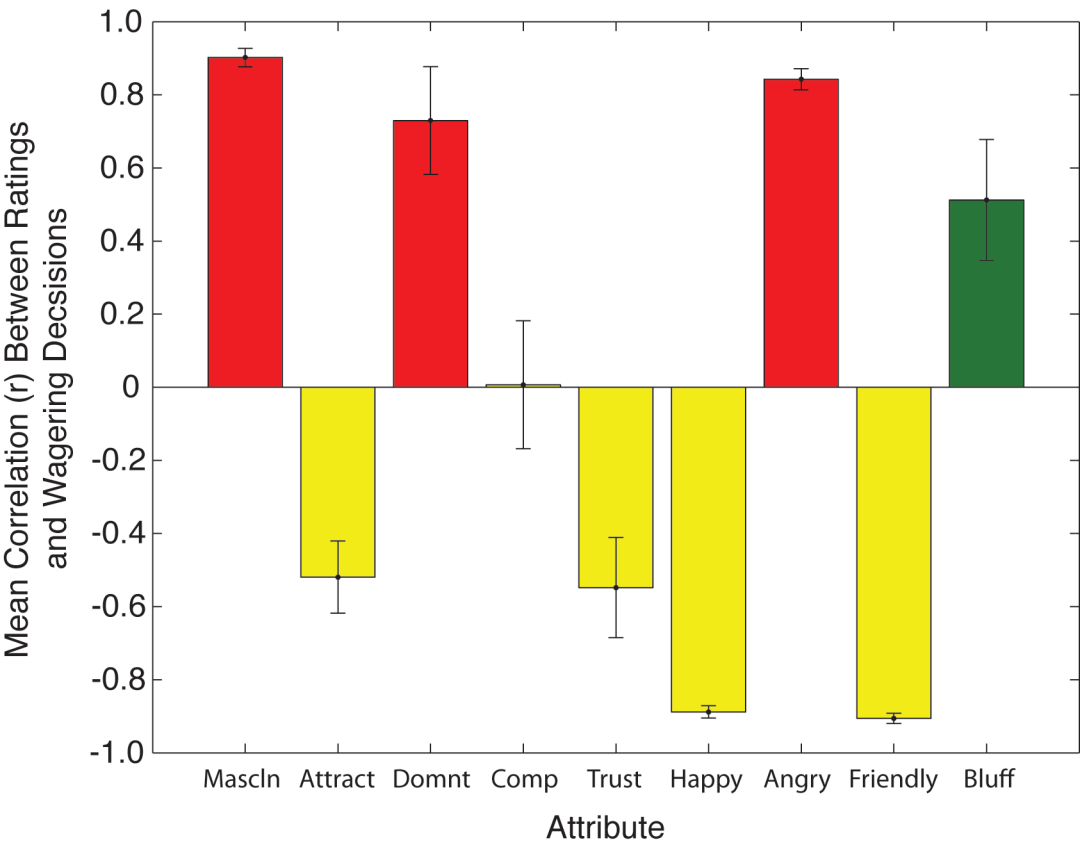

Supplement: S2 (10.1371/journal.pone.0011663.s002) [file journal.pone.0011663.s002]
